# Supplementary material
Source: ML conference proceedings conference paper supplement (https://proceedings.neurips.cc/paper_files/paper/2016/hash/c203d8a151612acf12457e4d67635a95-Abstract.html)
Supplement: Supplementary file [file c203d8a151612acf12457e4d67635a95-Supplemental.zip]

---

# Learning to Poke by Poking: Experiential Learning of Intuitive Physics

## Supplementary Materials

---

**Pulkit Agrawal\***   **Ashvin Nair\***   **Pieter Abbeel**   **Jitendra Malik**   **Sergey Levine**  
Berkeley Artificial Intelligence Research Laboratory (BAIR)  
University of California Berkeley  
{pulkitag, anair17, pabbeel, malik, svlevine}@berkeley.edu

The supplementary materials can be found at: <http://ashvin.me/pokebot-website/>.

---

\*equal contribution, authors are listed in alphabetical order.
